# Supplementary material
Source: publisher site journal article supplement (https://www.kjim.org/upload/media/kjim-2020-633-suppl1.pdf)
Supplement: Supplementary file 1 [file kjim-2020-633-suppl1.pdf]

**Supplementary Table 1. Comparison between RA patients with and without COVID-19 (SARS-CoV-2 positive)**

| Variable                         | Patients with COVID-19<br>(n = 33) | Negative controls<br>(n = 478) | p value |
|----------------------------------|------------------------------------|--------------------------------|---------|
| Age ≥ 60 years <sup>a</sup>      | 18 (54.6)                          | 262 (54.8)                     | 0.976   |
| Female sex <sup>a</sup>          | 26 (78.8)                          | 400 (83.7)                     | 0.465   |
| Comorbidities <sup>b</sup>       |                                    |                                |         |
| Diabetes mellitus                | 0                                  | 25 (5.2)                       | 0.178   |
| Hypertension                     | 2 (6.1)                            | 16 (3.4)                       | 0.414   |
| Cardiovascular disease           | 1 (3)                              | 20 (4.2)                       | 0.747   |
| Chronic lung disease             | 2 (6.1)                            | 6 (1.3)                        | 0.032   |
| Chronic kidney disease           | 0                                  | 3 (0.6)                        | 0.648   |
| Current medications <sup>c</sup> |                                    |                                |         |
| Glucocorticoid                   | 22 (66.7)                          | 337 (70.5)                     | 0.641   |
| Glucocorticoid dose ≥ 10 mg/day  | 11 (33.3)                          | 161 (33.7)                     | 0.967   |
| Hydroxychloroquine               | 20 (60.6)                          | 230 (48.1)                     | 0.165   |
| Methotrexate                     | 23 (69.7)                          | 298 (62.3)                     | 0.398   |
| Sulfasalazine                    | 14 (42.4)                          | 135 (28.2)                     | 0.083   |
| Leflunomide                      | 9 (27.3)                           | 119 (24.9)                     | 0.761   |
| Tacrolimus                       | 2 (6.1)                            | 51 (10.7)                      | 0.401   |
| TNF- $\alpha$ inhibitors         | 0                                  | 18 (3.8)                       | 0.256   |
| Tocilizumab                      | 0                                  | 11 (2.3)                       | 0.378   |
| Abatacept                        | 2 (6.1)                            | 6 (1.3)                        | 0.032   |
| Rituximab                        | 0                                  | 2 (0.4)                        | 0.710   |
| Tofacitinib                      | 0                                  | 2 (0.4)                        | 0.710   |

Values are presented as number (%).

RA, rheumatoid arthritis; COVID-19, coronavirus disease 2019; SARS-CoV-2, severe acute respiratory syndrome coronavirus 2; TNF, tumor necrosis factor.

<sup>a</sup>As recorded on the date of COVID-19 testing.

<sup>b</sup>Information on comorbidities is based on diagnostic codes (International Classification of Diseases, 10th edition [ICD-10]) in the claims data from January 1, 2015, to the test date.

<sup>c</sup>Use of medications within 3 months of the examination date was obtained from the database.
